# Supplementary material for: Evidence for Phenotypic Plasticity in Aggressive Triple-Negative Breast Cancer: Human Biology Is Recapitulated by a Novel Model System
Source: PubMed Central journal article supplement (PMC3458110; doi:10.1371/journal.pone.0045684), 2012-09-25

Figure S1

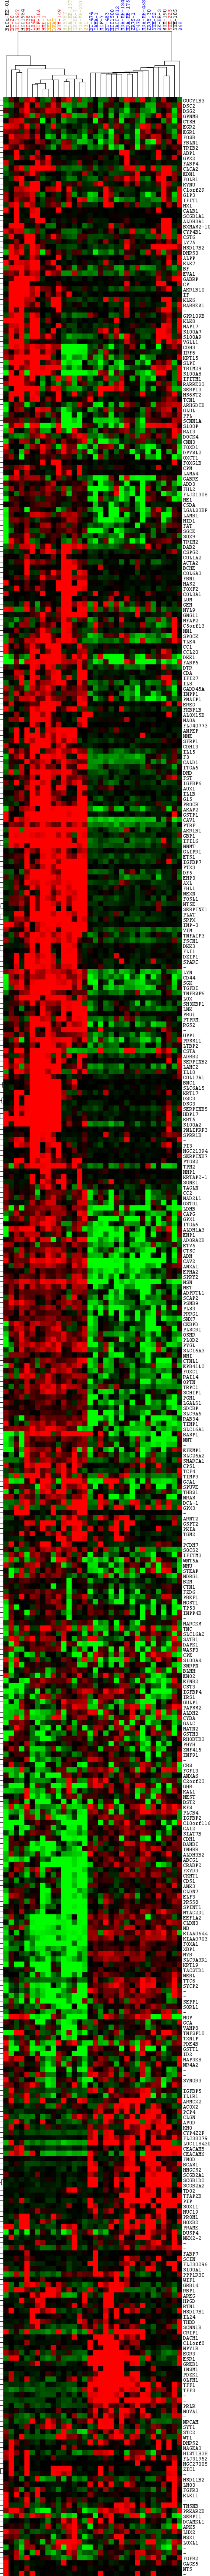

Supplement: pone.0045684.s001.pdf [file pone.0045684.s001.pdf]
